# Supplementary material
Source: PubMed Central journal article supplement (PMC298744)
Supplement: pnas_0237327100_2.pdf [file pnas_0237327100_2.pdf]

|          | 142                                                                                                  | 181 |
|----------|------------------------------------------------------------------------------------------------------|-----|
|          | ^                                                                                                    | ^   |
| h-p40    | DPQGVTCGAATLS AERVRGDNKEYE - YS VECQEDS ACPAAEESLP                                                   |     |
| pig-p40  | DPRGVTCG <b>T</b> ATLS - <b>EDL</b> - G - - - <b>EYKKYR</b> VEECQEGS ACPAAEESLP                      |     |
| sh-p40.1 | DPRGVTCG <b>T</b> ATLS - <b>EDL</b> - G - - - <b>EYKKYR</b> VEECQEGS ACPAAEESLP                      |     |
| sh-p40.4 | DPRGVTCG <b>T</b> ATLS - <b>EDL</b> - G - - - <b>EYKKYR</b> VEECQEGS ACPAAEESLP                      |     |
| sh-p40.3 | DP <b>H</b> GVTCG <b>T</b> ATLS - <b>EDL</b> - G - - - <b>EYKKYR</b> VEECQEGS ACPAAEESLP             |     |
| goat-p40 | DPRGVTCG <b>AAS</b> LS AE <b>KVS</b> MD <b>HREY</b> NKYTV <b>ECQ</b> EGS ACPAAEESLP                  |     |
| sh-p40.6 | DP <b>Q</b> GVTCG <b>AV</b> SLSAER <b>V</b> SMD <b>HREY</b> NKYTV <b>ECQ</b> EGS AC <b>P</b> SAEESLP |     |
| sh-p40.5 | DP <b>Q</b> GVTCG <b>AV</b> SLSAER <b>V</b> SMD <b>HREY</b> NKYTV <b>ECQ</b> EGS AC <b>P</b> SAEESLP |     |
| Cow-p40  | DPRGVTCG <b>AALL</b> SAE <b>KVS</b> LE <b>HREY</b> NKYTV <b>ECQ</b> EGS ACPAAEES <b>L</b>            |     |
| sh-p40.2 | DPRGVTCG <b>AALL</b> SAE <b>KVS</b> LE <b>HREY</b> NKY <b>R</b> VEECQEGS ACPAAEESLP                  |     |
